# Supplementary material for: A Size Filter Regulates Apical Protein Sorting
Source: Research Square preprint supplement (doi:10.21203/rs.3.rs-3210598/v1), 2023-08-04
Supplement: Supplementary file 1 [file 790bb81683da392b5a2b4dc8.xlsx]

## Sheet: Sheet1
Gene	Localization	Cyto AA	Total AA	Notes
CPO	Apical	0	374	GPI linked
DPEP1	Apical	0	409	GPI linked
FOLR1	Apical	0	255	GPI linked
UMOD	Apical	0	642	GPI linked
CA4	Apical	1	312	GPI linked
CEACAM5	Apical	1	702	GPI linked
CEACAM6	Apical	1	344	GPI linked
CEACAM7	Apical	1	265	GPI linked
NT5E	Apical	1	574	GPI linked
LCTL	Apical	3	566	Single-pass
UPK2	Apical	3	184	Single-pass
GGT1	Apical	4	569	Single-pass
PRSS8	Apical	4	342	Single-pass
CD36	Apical	6	472	Two-pass
DPP4	Apical	6	766	Single-pass
COMT	Apical	6	271	Single-pass
KI	Apical	9	983	Single-pass
PDPN	Apical	9	166	Single-pass
Cd13	Apical	10	967	Single-pass
Si	Apical	10	1827	Single-pass
IL2RA	Apical	11	272	Single-pass
CLCA4	Apical	12	921	Single-pass
Cd164	Apical	13	197	Single-pass
CD9	Apical	13	228	Four-pass
MGAM	Apical	13	1857	Single-pass
SLC9A2	Apical	13	813	Multipass
SUSD2	Apical	13	822	Single-pass
UPK1B	Apical	13	260	Multipass
HEXB	Apical	14	556	Single-pass
UPK1A	Apical	14	257	Multipass
ENTPD1	Apical	15	510	Two-pass
FUT6	Apical	15	359	Single-pass
SLC26A2	Apical	16	592	Multipass
SLC6A20	Apical	16	592	Multipass
ENPEP	Apical	18	954	Single-pass
TMPRSS15	Apical	18	1035	Single-pass
MFSD4B	Apical	20	425	Multipass
MUC4	Apical	20	2189	Single-pass
SLC17A1	Apical	20	467	Multipass
BST2	Apical	21	181	Single-pass
KCNA5	Apical	21	153	Multipass
MAL	Apical	21	153	Four-pass
BACE1	Apical	22	501	Single-pass
ENPP3	Apical	22	875	Single-pass
LCT	Apical	25	1827	Single-pass
MME	Apical	26	750	Single-pass
SLC7A9	Apical	30	487	Multipass
AT1B1	Apical	31	303	Single-pass
MAL2	Apical	34	176	Four-pass
P2RX4	Apical	34	388	Multipass
SCN2B	Apical	35	215	Two-pass
SLC44A4	Apical	35	710	Multipass
HPN	Apical	36	436	Single-pass
SLC6A19	Apical	36	634	Multipass
SLC17A4	Apical	38	497	Multipass
CRB1	Apical	38	1406	Single-pass
CRB2	Apical	39	1285	Single-pass
CRB3	Apical	39	120	Single-pass
Muc16	Apical	39	8478	Single-pass
SLC10A2	Apical	39	348	Multipass
BSG	Apical	40	385	Single-pass
DRAM2	Apical	40	267	Multipass
SLC15A1	Apical	40	708	Multipass
ACE2	Apical	41	805	Single-pass
SLCO1A2	Apical	46	670	Multipass
SLC22A5	Apical	47	557	Multipass
EMCN	Apical	48	261	Single-pass
HAVCR	Apical	50	298	Single-pass
SLC36A1	Apical	50	475	Multipass
GPNMB	Apical	51	554	Single-pass
PROM1	Apical	51	865	Multipass
SLC22A13	Apical	51	551	Multipass
UPK3A	Apical	54	287	Single-pass
SLC52A3	Apical	55	469	Multipass
CHST14	Apical	55	855	Single-pass
KCNK5	Apical	57	499	Single-pass
SLC15A2	Apical	57	729	Multipass
CLTRN	Apical	58	222	Single-pass
SLC22A3	Apical	61	556	Multipass
KCNE1	Apical	62	130	Multipass
RHCG	Apical	62	479	Multipass
SLC22A4	Apical	62	551	Multipass
MFRP	Apical	65	585	Single-pass
SLC22A7	Apical	66	540	Multipass
SLC22A7	Apical	66	540	Multipass
SLC1A1	Apical	67	524	Multipass
SLC2A12	Apical	67	617	Multipass
SLC5A8	Apical	67	610	Multipass
MUC13	Apical	68	512	Single-pass
SLC29A4	Apical	68	530	Multipass
AMN	Apical	69	453	Single-pass
SLC22A12	Apical	69	553	Multipass
CEACAM1	Apical	73	526	Single-pass
Muc1	Apical	73	1255	Single-pass
Podxl	Apical	75	558	Single-pass
SLC35A1	Apical	77	337	Multipass
SLC28A2	Apical	80	659	Multipass
SCNN1A	Apical	86	669	Two-pass
SLC3A1	Apical	86	685	Multipass
SCARB1	Apical	87	552	Two-pass
SCNN1B	Apical	87	638	Two-pass
SLC47A2	Apical	88	602	Multipass
GPR143	Apical	89	404	Multipass
SCNN1G	Apical	90	649	Two-pass
SLC47A1	Apical	92	570	Multipass
SLC5A12	Apical	93	619	Multipass
GPRC5A	Apical	94	357	Multipass
SLC34A1	Apical	99	639	Multipass
ADAM9	Apical	100	819	Single-pass
PIGR	Apical	102	764	Single-pass
IGSF5	Apical	103	369	Single-pass
SLC5A2	Apical	103	670	Multipass
SLCO4A1	Apical	103	722	Multipass
SLC16A2	Apical	105	545	Multipass
SLC30A4	Apical	113	430	Multipass
ENDOD1	Apical	121	403	Multipass
CEACAM20	Apical	123	577	Single-pass
SLC30A5	Apical	123	765	Multipass
SLC14A2	Apical	125	932	Multipass
PANX1	Apical	130	426	Multipass
CDHR2	Apical	132	1310	Multipass
SLC39A12	Apical	136	691	Multipass
CDHR5	Apical	154	845	Single-pass
Ngfr	Apical	154	427	Single-pass
Lrp2	Apical	208	4655	Single-pass
SLC26A6	Apical	251	758	Multipass
SLC26A3	Apical	264	764	Multipass
SLC26A4	Apical	269	780	Multipass
SLC12A2	Apical	283	1205	Multipass
ABCC2	Apical	288	1545	Multipass
SLC26A9	Apical	296	791	Multipass
CFTR	Apical	332	1480	Multipass
PTPRH	Apical	344	971	Multipass
PTPRO	Apical	371	1226	Single-pass
NRG1	Apical	374	640	Single-pass
SLC9A3	Apical	377	829	Multipass
ABCG2	Apical	383	655	Multipass
SLC12A3	Apical	414	1021	Multipass
SLC12A1	Apical	454	1095	Multipass
CD1D	Basolateral	12	335	Single-pass
CDH16	Basolateral	21	829	Single-pass
EPCAM	Basolateral	25	314	Single-pass
PTGFRN	Basolateral	25	879	Single-pass
EREG	Basolateral	27	169	Single-pass
ITGA2	Basolateral	27	1181	Single-pass
TMPRSS4	Basolateral	29	435	Single-pass
AQP3	Basolateral	30	292	Multipass
AREG	Basolateral	30	252	Single-pass
ITGA3	Basolateral	31	1051	Single-pass
PROM2	Basolateral	33	834	Multipass
SDC1	Basolateral	34	310	Single-pass
KITLG	Basolateral	36	273	Single-pass
CNNM2	Basolateral	39	875	Multipass
ASGR1	Basolateral	40	291	Single-pass
AGER	Basolateral	42	404	Single-pass
SLC51A	Basolateral	42	340	Multipass
SLC29A1	Basolateral	43	456	Multipass
APLP2	Basolateral	46	763	Single-pass
SLC44A2	Basolateral	46	719	Multipass
ITGB1	Basolateral	47	798	Single-pass
SLC7A7	Basolateral	47	511	Multipass
LDLR	Basolateral	50	860	Single-pass
ADAM10	Basolateral	51	747	Single-pass
SLC1A5	Basolateral	52	541	Multipass
ITGA6	Basolateral	54	1130	Single-pass
MICA	Basolateral	54	383	Single-pass
BCAM	Basolateral	57	628	Single-pass
FURIN	Basolateral	57	794	Single-pass
SLC16A3	Basolateral	57	465	Multipass
SLC10A1	Basolateral	58	362	Multipass
SLC22A6	Basolateral	58	563	Multipass
SLC2A9	Basolateral	58	540	Multipass
SLC41A1	Basolateral	60	512	Multipass
SLCO3A1	Basolateral	62	710	Multipass
SLC7A8	Basolateral	63	531	Multipass
FCG2B	Basolateral	63	310	Single-pass
SLC22A2	Basolateral	64	555	Multipass
SLC2A2	Basolateral	64	524	Multipass
SLC16A10	Basolateral	66	512	Multipass
TFRC	Basolateral	67	760	Single-pass
SLC22A1	Basolateral	67	550	Multipass
SLC22A8	Basolateral	68	542	Multipass
SLC16A8	Basolateral	70	504	Multipass
SLC22A9	Basolateral	70	553	Multipass
LHCGR	Basolateral	71	699	Multipass
Cd44	Basolateral	71	742	Single-pass
SLC51B	Basolateral	71	128	Single-pass
SLC8A1	Basolateral	72	970	Multipass
AQP4	Basolateral	74	323	Multipass
SLC1A3	Basolateral	74	542	Multipass
ENPP1	Basolateral	76	925	Single-pass
IL6RA	Basolateral	82	468	Single-pass
SLC9B2	Basolateral	82	537	Multipass
TSHR	Basolateral	82	764	Multipass
SLC5A5	Basolateral	93	550	Multipass
SEMA4B	Basolateral	99	837	Single-pass
CLSTN1	Basolateral	100	981	Single-pass
LRP1	Basolateral	100	4544	Single-pass
SLC16A4	Basolateral	103	487	Multipass
SLC23A2	Basolateral	104	650	Multipass
CXADR	Basolateral	105	365	Single-pass
SLCO4C1	Basolateral	105	724	Multipass
L1CAM	Basolateral	113	1256	Single-pass
DAG1	Basolateral	120	892	Single-pass
STRA6	Basolateral	126	647	Multipass
ADAM17	Basolateral	132	824	Single-pass
SLC39A5	Basolateral	133	535	Multipass
Cdh1	Basolateral	151	882	Single-pass
CDH3	Basolateral	152	829	Single-pass
Egf	Basolateral	153	1207	Single-pass
Dsc3	Basolateral	182	896	Single-pass
SLC26A7	Basolateral	186	656	Multipass
SLITRK4	Basolateral	194	838	Single-pass
STEAP3	Basolateral	207	488	Multipass
KCNJ10	Basolateral	212	379	Two-pass
DCBLD2	Basolateral	225	775	Single-pass
CHRM3	Basolateral	242	590	Multipass
KCNJ16	Basolateral	248	418	Two-pass
BSND	Basolateral	267	320	Two-pass
STX4	Basolateral	273	298	Single-pass
KCNJ4	Basolateral	275	445	Two-pass
IL6ST	Basolateral	276	918	Single-pass
ABCC1	Basolateral	282	1531	Multipass
ABCC3	Basolateral	282	1527	Multipass
ABCC6	Basolateral	285	1503	Multipass
BEST1	Basolateral	298	585	Multipass
ANO6	Basolateral	299	910	Multipass
CELSR2	Basolateral	310	2926	Multipass
KCNQ1	Basolateral	322	676	Multipass
ABCC4	Basolateral	327	1325	Multipass
TRPC4	Basolateral	328	974	Multipass
CLCN2	Basolateral	349	898	Multipass
TRPC1	Basolateral	350	793	Multipass
TGFBR1	Basolateral	352	503	Single-pass
INSR	Basolateral	402	1382	Single-pass
ATP2B1	Basolateral	415	1220	Multipass
ATP2B4	Basolateral	415	1241	Multipass
ABCG1	Basolateral	420	678	Multipass
SLC4A1	Basolateral	424	927	Multipass
EPHB4	Basolateral	427	987	Single-pass
MET	Basolateral	435	1390	Single-pass
SLC4A4	Basolateral	471	1079	Multipass
EGFR	Basolateral	542	1210	Single-pass
ERBB2	Basolateral	585	1259	Single-pass
PLXNB2	Basolateral	620	1842	Single-pass
PLXNB1	Basolateral	624	2119	Single-pass
PLXNA1	Basolateral	631	1896	Single-pass
ATP7B	Basolateral	653	1465	Multipass
ERBB3	Basolateral	678	1342	Single-pass
ITGB4	Basolateral	1088	1822	Single-pass
